# Supplementary material for: Genetic Characteristics of Wuxiang Virus in Shanxi Province, China
Source: MDPI journal article supplement (doi:10.3390/v16010103), 2024-01-10
Supplement: s1 [file s1]

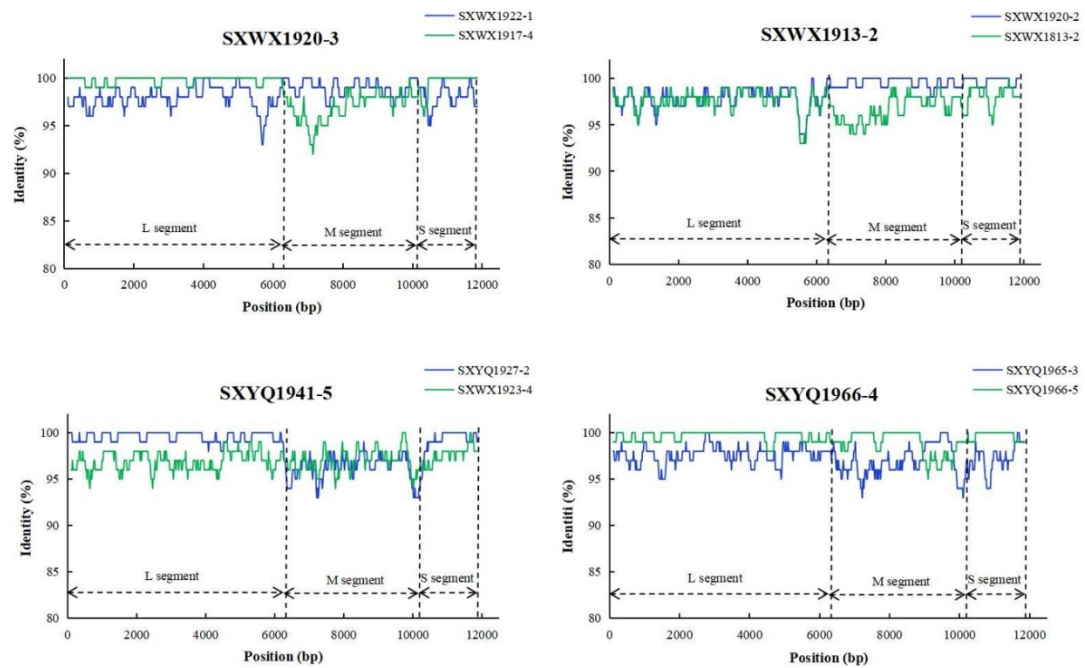

**Figure S2.** The validation of the detected reassortment/recombination events in clade 1 by Simplot.
