# Supplementary material for: Genetic Characteristics of Wuxiang Virus in Shanxi Province, China
Source: MDPI journal article supplement (doi:10.3390/v16010103), 2024-01-10
Supplement: s1 [file s1]

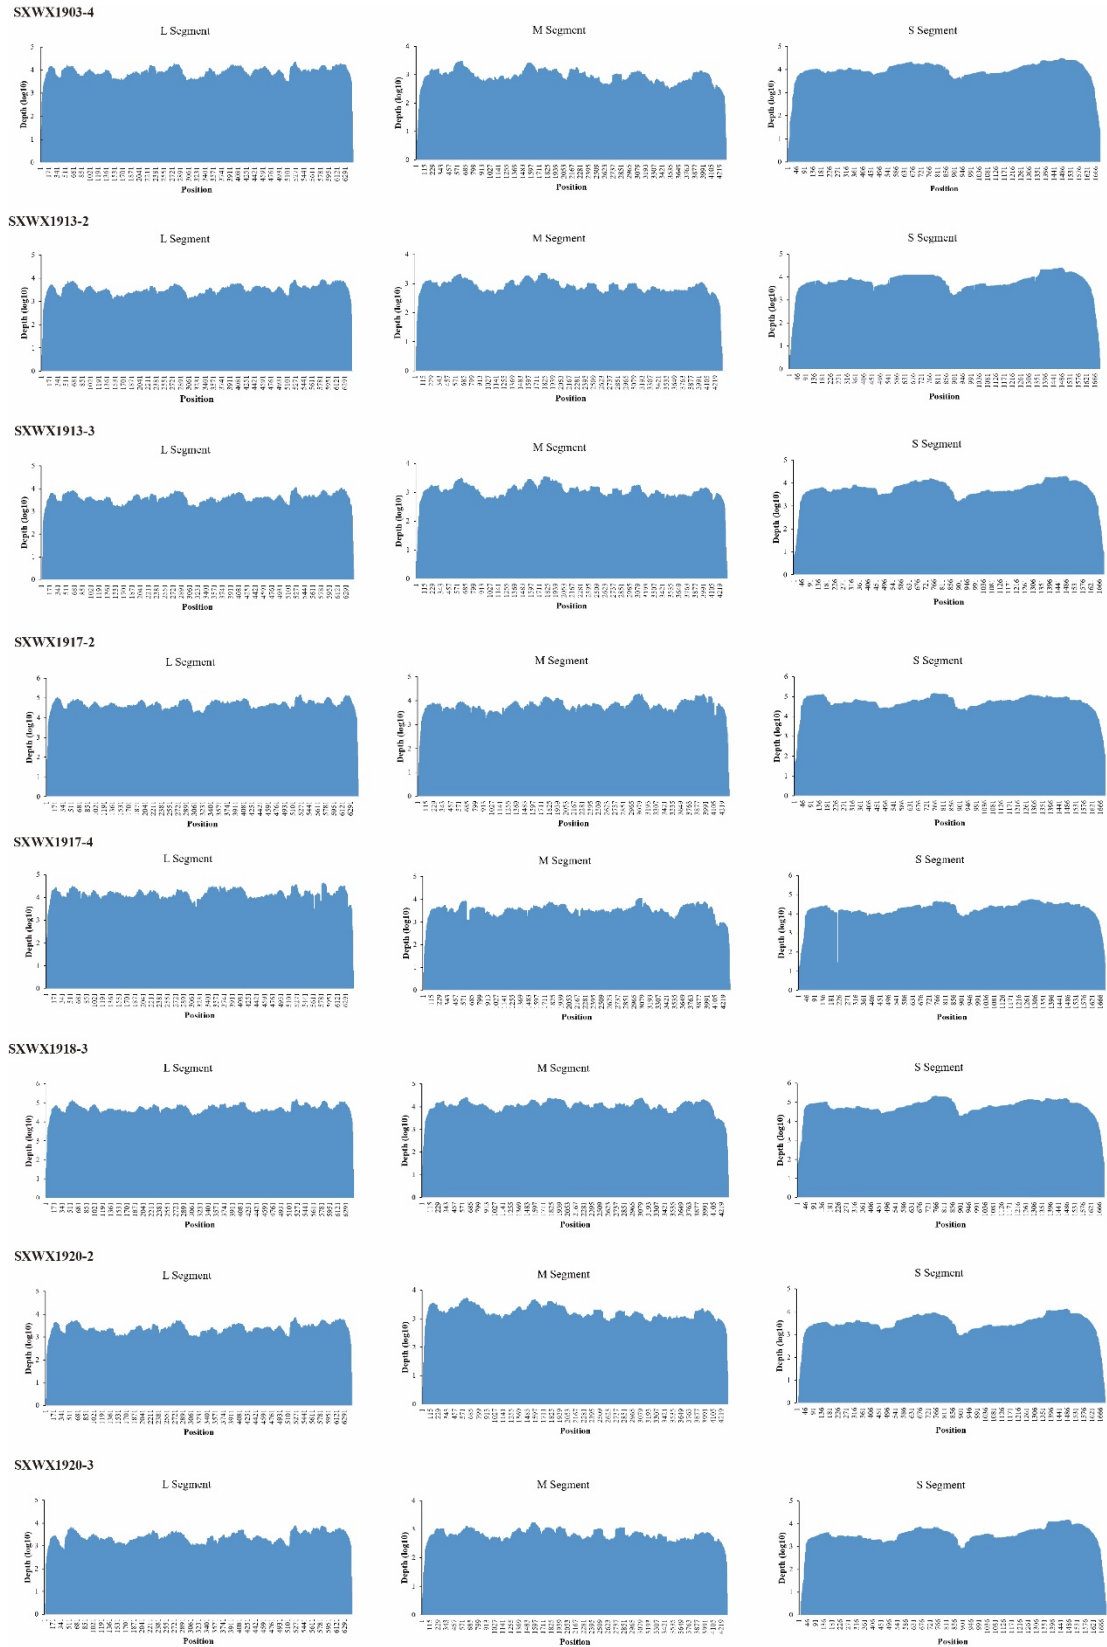

Figure S1. Continue.

SXWX1922-1

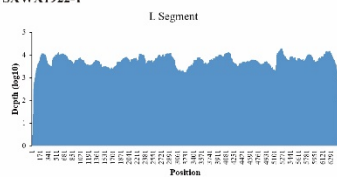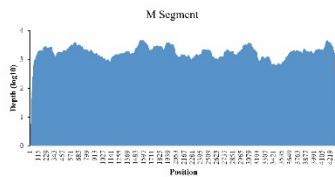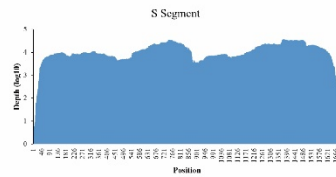

SXWX1923-4

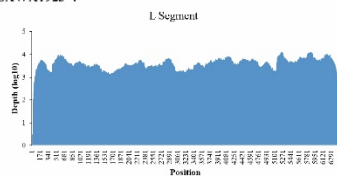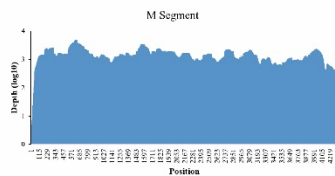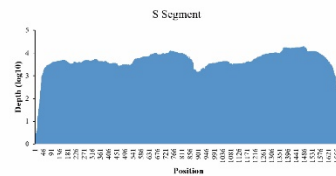

SXWX1933

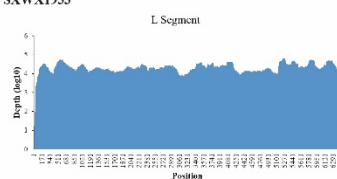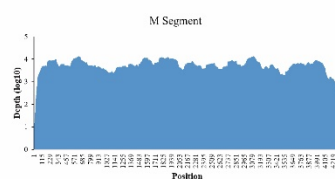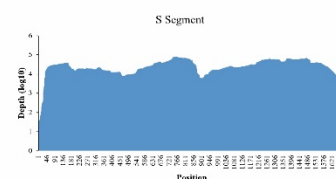

SXYQ1914-5

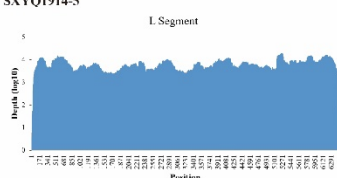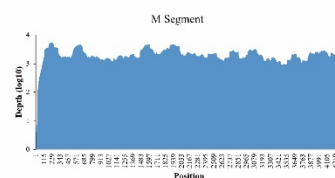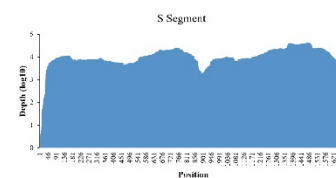

SXYQ1916

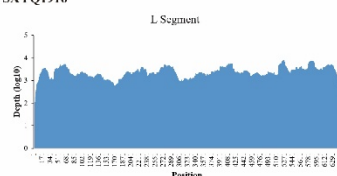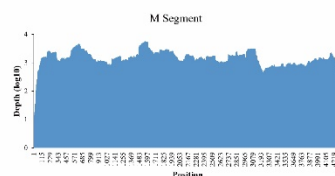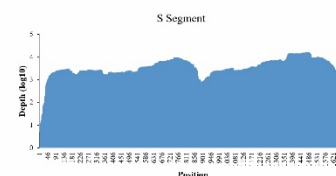

SXYQ1917-1

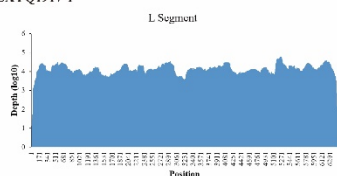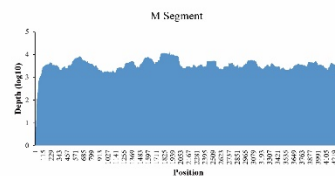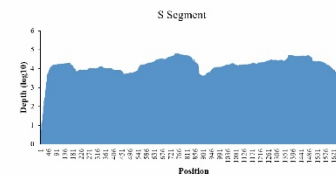

SXYQ1917-4

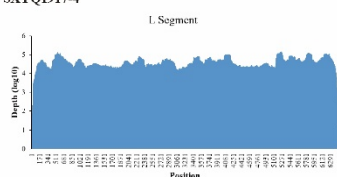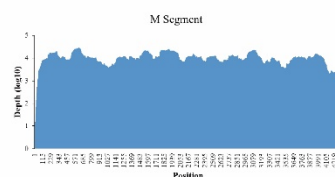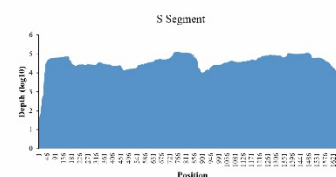

SXYQ1918-2

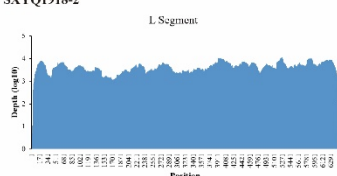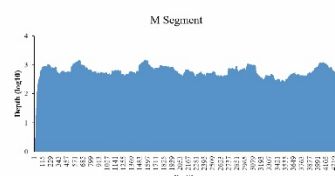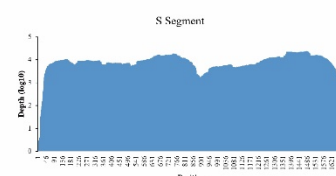

Figure S1. Continue.

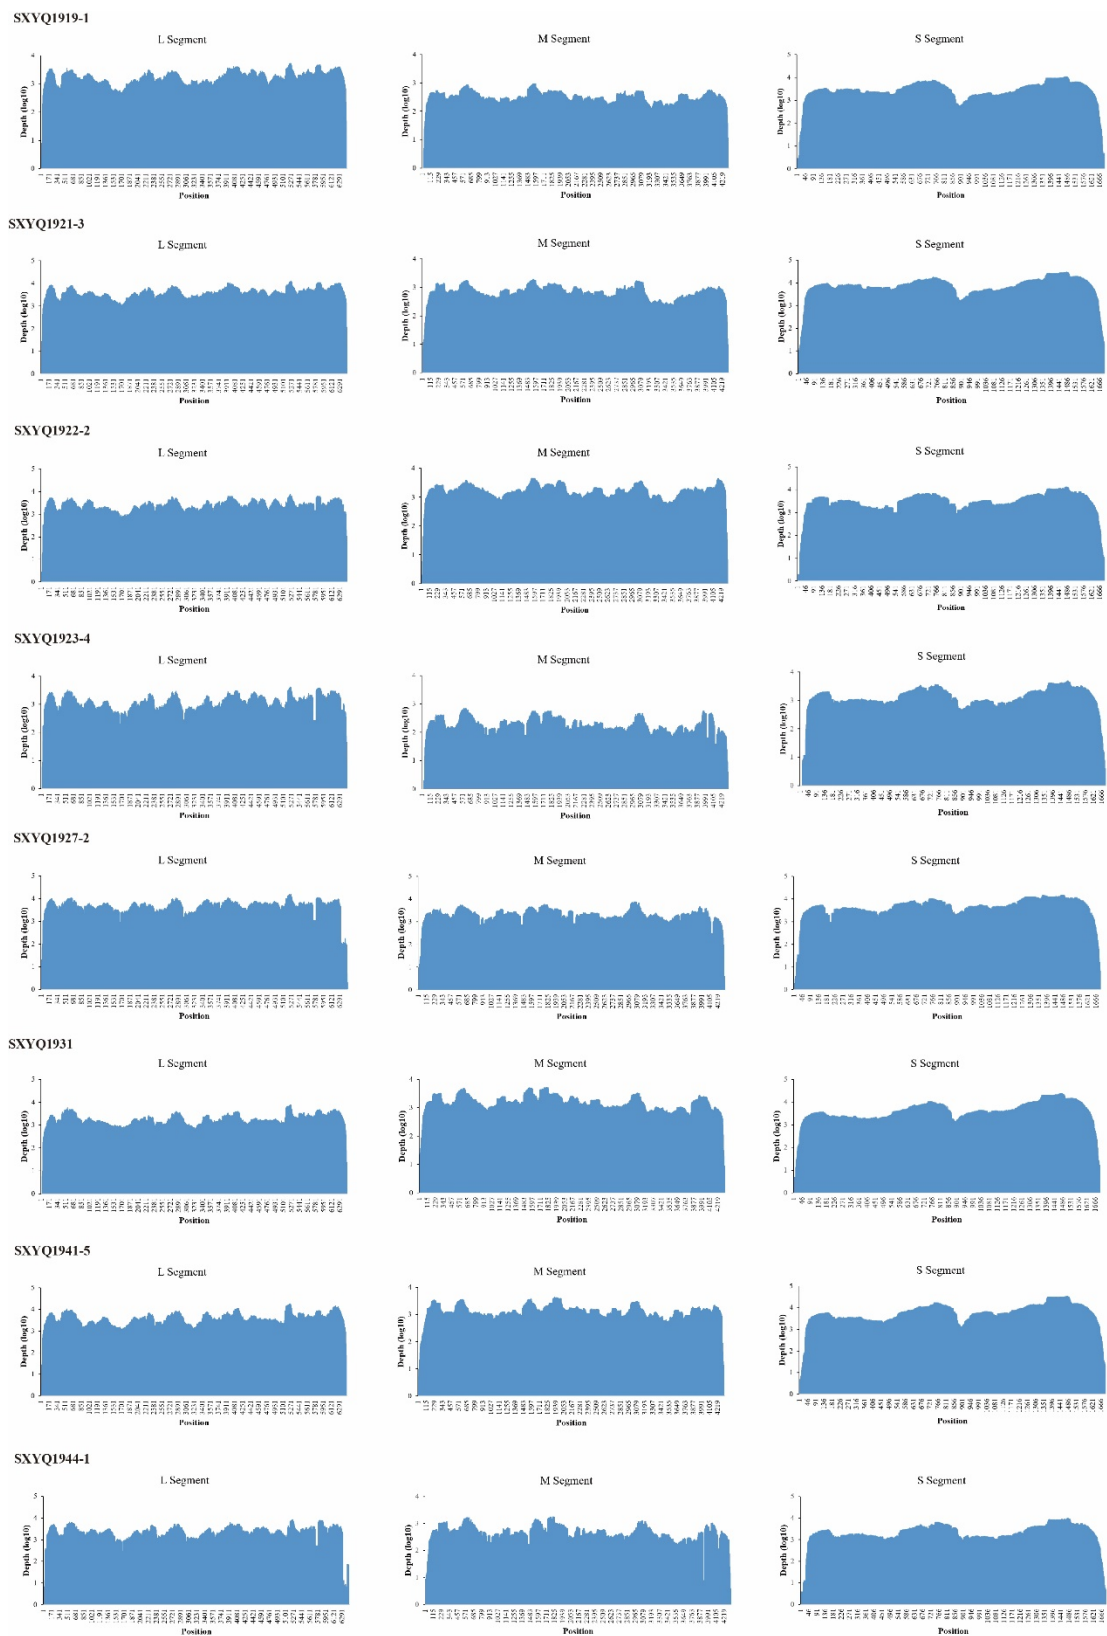

Figure S1. Continue.

SXYQ1964-2

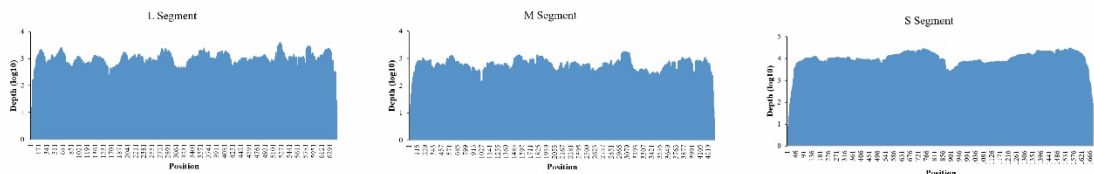

SXYQ1965-3

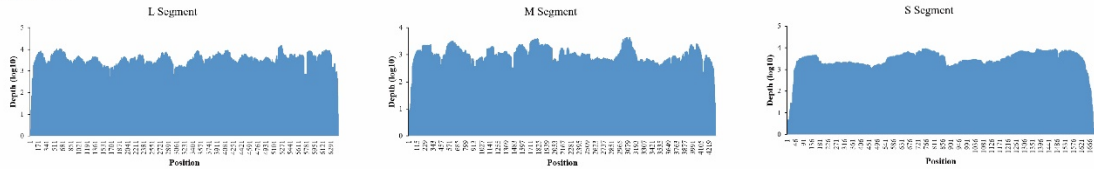

SXYQ1903

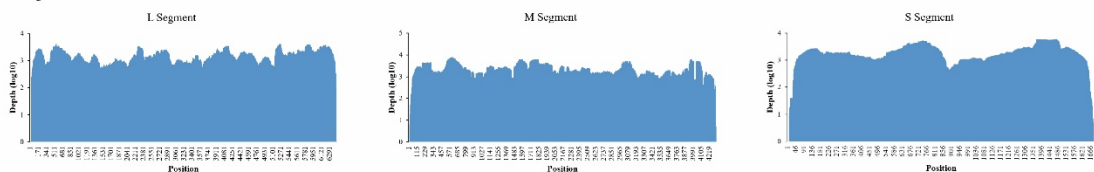

SXYQ1966-2

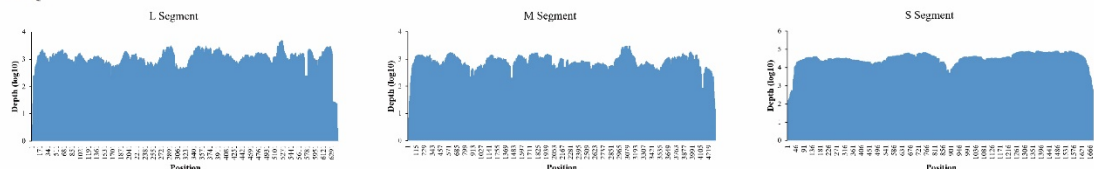

SXYQ1966-4

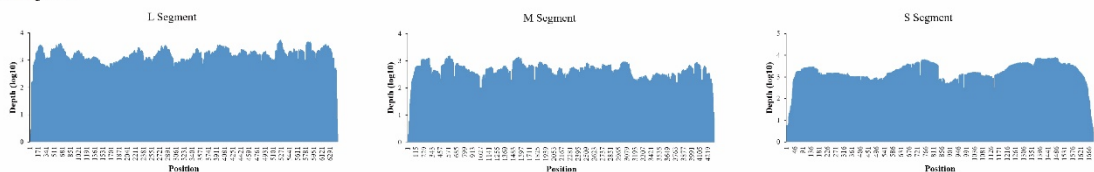

SXYQ1966-5

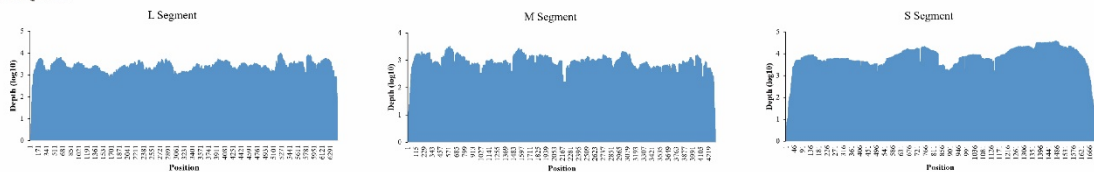

SXYQ1968-2

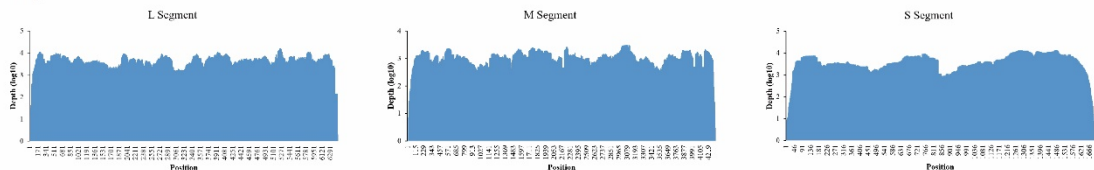

SXYQ1968-3

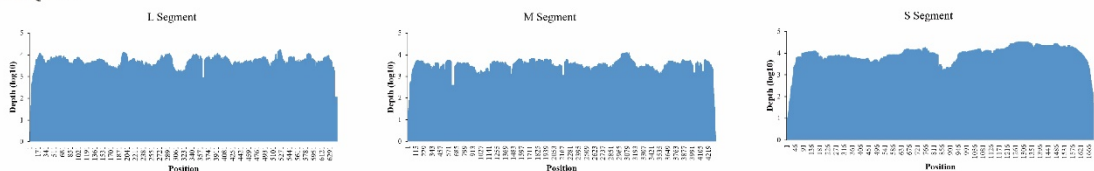

Figure S1. Continue.

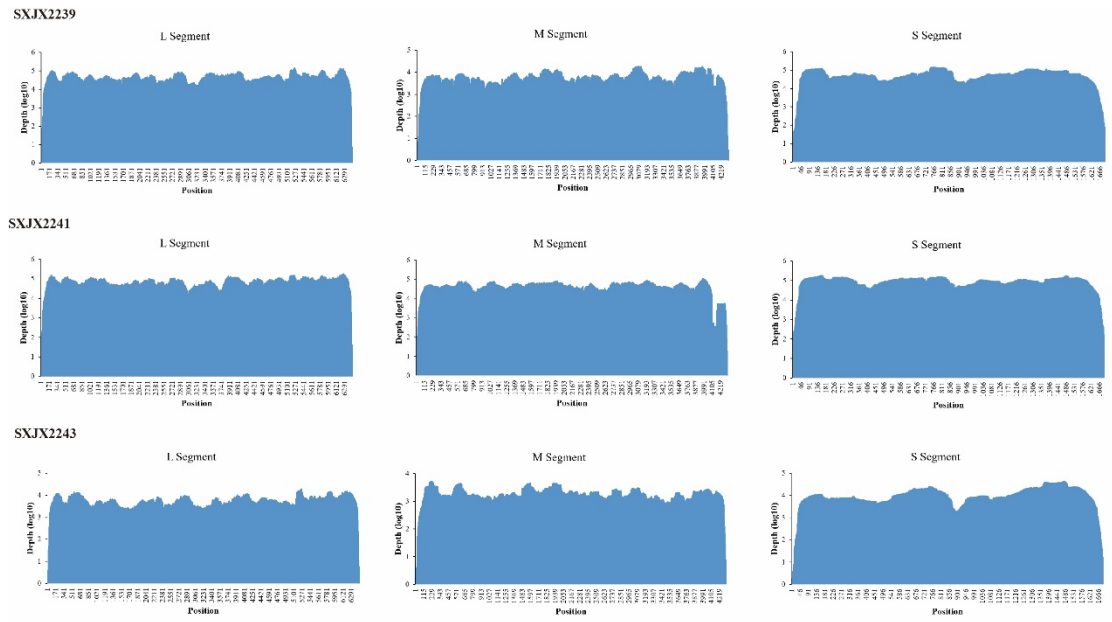

**Figure S1.** Coverage depth of the downstream data mapping results from the WUXV strains sequenced in this study.
