# Supplementary material for: Genetic Characteristics of Wuxiang Virus in Shanxi Province, China
Source: MDPI journal article supplement (doi:10.3390/v16010103), 2024-01-10
Supplement: s1 [file s1]

**Table S6.** The amino acid substitutions in two clades of WUXV.

| Segment<br>(Protein) | Site | Clade 1 (codon) | Clade 2 (codon) |
|----------------------|------|-----------------|-----------------|
| L<br>(RdRp)          | 100  | R(AGG)          | K(AAG)          |
|                      | 252  | F(TTC)          | Y(TAT)          |
|                      | 261  | R(AGG)          | K(AAG)          |
|                      | 266  | T(ACA)          | S(TCA)          |
|                      | 282  | A(GAT)          | V(GTT)          |
|                      | 345  | D(GAT)          | E(GAA)          |
|                      | 348  | I(ATC)          | V(GTT)          |
|                      | 448  | D(GAC)          | E(GAA)          |
|                      | 484  | I(ATC)          | V(GTC)          |
|                      | 799  | S(AGT)          | I(ATT)          |
|                      | 1653 | I(ATA)          | T(ACA)          |
|                      | 1757 | I(ATT)          | M(ATG)          |
|                      | 1761 | N(AAC)          | S(AGT)          |
|                      | 1780 | I(ATA)          | V(GTG)          |
|                      | 1831 | N(AAT)          | K(AAA)          |
|                      | 1976 | T(ACC)          | A(GCC)          |
|                      | 2073 | V(GTT)          | I(ATT)          |
| M<br>(Gp)            | 2    | F(TTT)          | I(ATT)          |
|                      | 93   | T(ACA)          | S(TCA)          |
|                      | 101  | R(AGG)          | K(AAG)          |
|                      | 105  | H(CAT)          | Y(TAT)          |
|                      | 142  | A(GCT); T(ACT)  | D(GAT); N(AAT)  |
|                      | 143  | A(GCT)          | V(GTT)          |
|                      | 145  | D(GAT)          | E(GAG)          |
|                      | 210  | N(AAT)          | S(AGC)          |
|                      | 218  | E(GAA)          | G(GGG)          |
|                      | 219  | K(AAG)          | R(AGA)          |
|                      | 237  | E(GAA)          | D(GAT)          |
|                      | 255  | S(TCC)          | T(ACT)          |
|                      | 271  | E(GAG)          | D(GAT)          |
|                      | 281  | S(TCT)          | T(ACA)          |
|                      | 284  | S(TCT)          | A(GCT)          |
|                      | 289  | P(CCA)          | S(TCA)          |
|                      | 292  | V(GTT)          | I(ATT)          |
|                      | 297  | I(ATA)          | M(ATG)          |
|                      | 306  | L(CTA); I(ATA)  | M(ATG)          |
|                      | 312  | A(GCA)          | S(TCA)          |
|                      | 313  | S(AGT)          | D(GAT)          |
|                      | 314  | Q(CAA)          | L(CTA)          |

|            |                |                |
|------------|----------------|----------------|
| 318        | T(ACA); A(GCA) | K(AAG)         |
| 320        | L(CTG)         | P(CCA)         |
| 340        | P(CCC); A(GCC) | D(GAC)         |
| 350        | I(ATA)         | V(GTA)         |
| 361        | D(GAC)         | S(AGC)         |
| 480        | M(ATG)         | L(TTG)         |
| 491        | M(ATG)         | V(GTG)         |
| 493        | K(AAG)         | Q(CAG)         |
| 496        | S(AGC)         | D(GAT)         |
| 514        | D(GAT)         | N(AAT)         |
| 530        | E(GAA)         | D(GAC)         |
| 623        | M(ATG)         | R(AGG)         |
| 627        | Q(CAG)         | R(CGG)         |
| 639        | I(ATA)         | V(GTG)         |
| 695        | V(GTA)         | A(GCA)         |
| 731        | F(TTT)         | L(ATT)         |
| 760        | T(ACA); A(GCA) | I(ATA)         |
| 768        | L(CTG)         | V(GTG)         |
| 770        | A(GCT)         | I(ATC)         |
| 774        | I(ATA)         | V(GTA)         |
| 786        | L(TTG)         | V(GTG)         |
| 790        | L(CTA)         | V(GTC); I(ATC) |
| 793        | I(ATA)         | V(GTA)         |
| 795        | G(GGG)         | K(AAG)         |
| 798        | R(AGG)         | K(AAG)         |
| 818        | D(GAC)         | E(GAA)         |
| 824        | V(GTG)         | M(ATG)         |
| 830        | A(GCA)         | M(ATG); V(GTT) |
| 847        | V(GTC)         | I(ATC)         |
| 1032       | S(TCT)         | H(CAT)         |
| 1041       | P(CCT)         | S(TCT)         |
| 1117       | D(GAC); G(GGC) | N(AAC)         |
| 1230       | T(ACT)         | P(CCT)         |
| 1324       | T(ACA)         | M(ATG)         |
| 1343       | A(GCT)         | I(ATC)         |
| 1346       | I(ATA)         | V(GTA)         |
| 1349       | V(GTC)         | I(ATC)         |
| 1353       | V(GTC)         | I(ATC)         |
| S<br>(NSs) | 99             | I(ATC)         |
|            | 102            | M(ATG)         |
|            | 157            | K(AAG)         |
|            | 166            | V(GTT)         |
|            | 195            | A(GCA)         |

|          |     |        |        |
|----------|-----|--------|--------|
|          | 206 | P(CCC) | S(TCC) |
|          | 212 | H(CAC) | Y(TAT) |
|          | 228 | E(GAA) | G(GGG) |
|          | 230 | P(CCT) | S(TCT) |
| S<br>(N) | 136 | L(CTT) | I(ATC) |

---
