# Supplementary material for: Genetic Characteristics of Wuxiang Virus in Shanxi Province, China
Source: MDPI journal article supplement (doi:10.3390/v16010103), 2024-01-10
Supplement: s1 [file s1]

**Table S4.** The homology analysis of nucleotides and amino acid in ORF sequence in NSs gene.

| No. | Strain     | No.  |      |      |      |       |       |      |       |       |      |       |       |      |       |      |      |      |      |      |      |      |      |       |       |       |       |       |      |       |       |      |       |      |      |
|-----|------------|------|------|------|------|-------|-------|------|-------|-------|------|-------|-------|------|-------|------|------|------|------|------|------|------|------|-------|-------|-------|-------|-------|------|-------|-------|------|-------|------|------|
|     |            | 1    | 2    | 3    | 4    | 5     | 6     | 7    | 8     | 9     | 10   | 11    | 12    | 13   | 14    | 15   | 16   | 17   | 18   | 19   | 20   | 21   | 22   | 23    | 24    | 25    | 26    | 27    | 28   | 29    | 30    | 31   | 32    | 33   |      |
| 1   | SXJX2239   | ***  | 99.6 | 98.6 | 88.6 | 88.3  | 88.3  | 88.4 | 88.8  | 88.8  | 88.3 | 88.2  | 89.0  | 88.6 | 88.8  | 88.5 | 89.1 | 88.8 | 88.8 | 88.8 | 88.9 | 89.3 | 89.1 | 87.6  | 89.3  | 89.1  | 89.4  | 89.3  | 89.1 | 88.0  | 88.0  | 88.1 | 88.1  | 88.3 | 88.3 |
| 2   | SXJX2241   | 99.6 | ***  | 98.7 | 88.8 | 88.4  | 88.4  | 88.5 | 88.6  | 88.6  | 88.4 | 88.0  | 89.1  | 88.8 | 88.6  | 88.6 | 89.3 | 88.9 | 88.9 | 88.9 | 89.0 | 89.4 | 89.3 | 87.7  | 89.4  | 89.3  | 89.5  | 89.4  | 89.3 | 88.1  | 88.1  | 88.3 | 88.3  | 88.4 |      |
| 3   | SXJX2243   | 98.5 | 98.9 | ***  | 89.3 | 88.9  | 88.9  | 89.0 | 89.4  | 89.4  | 88.9 | 88.9  | 89.7  | 89.3 | 89.4  | 89.1 | 89.8 | 89.4 | 89.4 | 89.4 | 89.5 | 89.9 | 89.8 | 88.3  | 89.9  | 89.8  | 90.0  | 89.9  | 89.8 | 88.6  | 88.6  | 88.8 | 88.8  | 88.9 |      |
| 4   | SXWX1903-4 | 94.3 | 94.6 | 95.0 | ***  | 98.3  | 98.3  | 98.7 | 97.3  | 97.6  | 98.6 | 97.3  | 99.1  | 99.0 | 97.6  | 99.6 | 97.1 | 96.9 | 96.9 | 96.9 | 97.1 | 97.1 | 97.1 | 96.8  | 97.2  | 97.1  | 97.3  | 97.2  | 97.1 | 96.9  | 96.9  | 97.1 | 97.1  | 97.1 |      |
| 5   | SXWX1913-2 | 94.3 | 94.6 | 94.6 | 98.1 | ***   | 100.0 | 99.4 | 97.2  | 97.4  | 99.7 | 97.0  | 99.0  | 98.9 | 97.4  | 98.5 | 97.2 | 96.8 | 96.8 | 96.8 | 96.9 | 97.2 | 97.2 | 96.9  | 97.3  | 97.2  | 97.4  | 97.3  | 97.2 | 97.1  | 97.1  | 96.9 | 96.9  | 96.9 |      |
| 6   | SXWX1913-3 | 94.3 | 94.6 | 94.6 | 98.1 | 100.0 | ***   | 99.4 | 97.2  | 97.4  | 99.7 | 97.0  | 99.0  | 98.9 | 97.4  | 98.5 | 97.2 | 96.8 | 96.8 | 96.8 | 96.9 | 97.2 | 97.2 | 96.9  | 97.3  | 97.2  | 97.4  | 97.3  | 97.2 | 97.1  | 97.1  | 96.9 | 96.9  | 96.9 |      |
| 7   | SXWX1917-1 | 94.6 | 95.0 | 95.0 | 98.5 | 98.9  | 98.9  | ***  | 97.6  | 97.8  | 99.6 | 97.4  | 99.4  | 99.2 | 97.8  | 98.9 | 97.6 | 97.2 | 97.2 | 97.2 | 97.3 | 97.3 | 97.3 | 97.1  | 97.4  | 97.3  | 97.6  | 97.4  | 97.6 | 97.2  | 97.2  | 97.3 | 97.3  |      |      |
| 8   | SXWX1917-4 | 95.0 | 95.4 | 95.8 | 99.2 | 98.9  | 98.9  | 99.2 | ***   | 99.7  | 97.4 | 100.0 | 98.0  | 98.1 | 99.7  | 97.4 | 96.9 | 96.8 | 96.8 | 96.8 | 96.9 | 96.9 | 96.9 | 96.7  | 97.1  | 96.9  | 97.2  | 97.1  | 96.9 | 96.8  | 96.8  | 96.9 | 96.9  |      |      |
| 9   | SXWX1918-3 | 95.0 | 95.4 | 95.8 | 99.2 | 98.9  | 98.9  | 99.2 | 100.0 | ***   | 97.7 | 99.9  | 98.2  | 98.3 | 100.0 | 97.7 | 97.2 | 97.1 | 97.1 | 97.1 | 97.2 | 97.2 | 97.2 | 96.9  | 97.3  | 97.2  | 97.4  | 97.3  | 97.2 | 97.1  | 97.1  | 97.2 | 97.2  | 97.4 |      |
| 10  | SXWX1920-2 | 94.6 | 95.0 | 95.0 | 98.5 | 99.6  | 99.6  | 99.2 | 99.2  | 99.2  | ***  | 97.3  | 99.2  | 99.1 | 97.7  | 98.7 | 97.2 | 97.1 | 97.1 | 97.1 | 97.2 | 97.2 | 97.2 | 97.2  | 97.3  | 97.2  | 97.4  | 97.3  | 97.2 | 97.3  | 97.3  | 97.2 | 97.2  |      |      |
| 11  | SXWX1920-3 | 94.4 | 94.9 | 95.3 | 99.6 | 98.7  | 98.7  | 99.1 | 100.0 | 100.0 | 99.1 | ***   | 98.0  | 98.0 | 99.9  | 97.4 | 96.9 | 96.7 | 96.7 | 96.7 | 96.9 | 97.0 | 96.9 | 96.6  | 97.0  | 96.9  | 97.2  | 97.0  | 96.9 | 96.7  | 96.7  | 96.9 | 96.9  |      |      |
| 12  | SXWX1922-1 | 95.0 | 95.4 | 95.8 | 99.2 | 98.9  | 98.9  | 99.2 | 100.0 | 100.0 | 99.2 | 100.0 | ***   | 99.6 | 98.2  | 99.2 | 97.7 | 97.6 | 97.6 | 97.6 | 97.7 | 97.7 | 97.7 | 97.4  | 97.8  | 97.7  | 98.0  | 97.8  | 97.7 | 97.6  | 97.6  | 97.7 | 97.7  |      |      |
| 13  | SXWX1923-4 | 94.6 | 95.0 | 95.4 | 98.9 | 98.5  | 98.5  | 98.9 | 99.6  | 99.6  | 98.9 | 99.6  | 99.6  | ***  | 98.3  | 99.1 | 97.6 | 97.4 | 97.4 | 97.4 | 97.6 | 97.6 | 97.6 | 97.3  | 97.7  | 97.6  | 97.8  | 97.7  | 97.6 | 97.4  | 97.4  | 97.6 | 97.6  |      |      |
| 14  | SXWX1933   | 95.0 | 95.4 | 95.8 | 99.2 | 98.9  | 98.9  | 99.2 | 100.0 | 100.0 | 99.2 | 100.0 | 100.0 | 99.6 | ***   | 97.7 | 97.2 | 97.1 | 97.1 | 97.1 | 97.2 | 97.2 | 97.2 | 96.9  | 97.3  | 97.2  | 97.4  | 97.3  | 97.2 | 97.1  | 97.1  | 97.2 | 97.2  |      |      |
| 15  | SXWX1813-2 | 94.3 | 94.6 | 95.0 | 99.2 | 98.1  | 98.1  | 98.5 | 99.2  | 99.2  | 98.5 | 99.6  | 99.2  | 98.9 | 99.2  | ***  | 97.2 | 97.1 | 97.1 | 97.1 | 97.2 | 97.2 | 97.2 | 96.9  | 97.3  | 97.2  | 97.4  | 97.3  | 97.2 | 97.1  | 97.1  | 97.2 | 97.2  |      |      |
| 16  | SXYQ1903   | 93.9 | 94.3 | 94.6 | 98.1 | 97.7  | 97.7  | 98.9 | 98.9  | 98.9  | 98.1 | 99.1  | 98.9  | 98.5 | 98.9  | 98.1 | ***  | 98.3 | 98.3 | 98.3 | 98.5 | 99.5 | 99.5 | 96.9  | 99.6  | 99.5  | 99.7  | 99.6  | 99.7 | 97.2  | 97.2  | 97.2 | 98.2  |      |      |
| 17  | SXYQ1916   | 94.6 | 95.0 | 95.4 | 98.1 | 97.7  | 97.7  | 98.1 | 98.9  | 98.9  | 98.1 | 99.1  | 98.9  | 98.5 | 98.9  | 98.1 | 98.5 | ***  | 99.7 | 99.7 | 99.9 | 98.3 | 98.3 | 96.8  | 98.5  | 98.3  | 98.6  | 98.5  | 98.3 | 96.9  | 96.9  | 97.1 | 97.1  |      |      |
| 18  | SXYQ1918-2 | 94.6 | 95.0 | 95.4 | 98.1 | 97.7  | 97.7  | 98.1 | 98.9  | 98.9  | 98.1 | 99.1  | 98.9  | 98.5 | 98.9  | 98.1 | 98.5 | 99.2 | ***  | 99.7 | 99.9 | 98.3 | 98.3 | 96.8  | 98.5  | 98.3  | 98.6  | 98.5  | 98.3 | 96.9  | 96.9  | 97.1 | 97.1  |      |      |
| 19  | SXYQ1919-1 | 95.0 | 95.4 | 95.4 | 98.1 | 97.7  | 97.7  | 98.1 | 98.9  | 98.9  | 98.1 | 99.1  | 98.9  | 98.5 | 98.9  | 98.1 | 98.5 | 99.2 | 99.2 | ***  | 99.9 | 98.3 | 98.3 | 96.8  | 98.5  | 98.3  | 98.6  | 98.5  | 98.3 | 96.9  | 96.9  | 97.1 | 97.1  |      |      |
| 20  | SXYQ1921-3 | 95.0 | 95.4 | 95.8 | 98.5 | 98.1  | 98.1  | 98.5 | 99.2  | 99.2  | 98.5 | 99.6  | 99.2  | 98.9 | 99.2  | 98.5 | 98.9 | 99.6 | 99.6 | 99.6 | ***  | 98.5 | 98.5 | 96.9  | 98.6  | 98.5  | 98.7  | 98.6  | 98.5 | 97.1  | 97.1  | 97.2 | 97.2  |      |      |
| 21  | SXYQ1931   | 94.3 | 94.6 | 95.0 | 98.5 | 98.1  | 98.1  | 98.5 | 99.2  | 99.2  | 98.5 | 99.6  | 99.2  | 98.9 | 99.2  | 98.5 | 98.9 | 98.9 | 98.9 | 98.9 | 99.2 | ***  | 99.5 | 96.9  | 99.6  | 99.5  | 99.7  | 99.6  | 99.5 | 97.2  | 97.2  | 97.2 |       |      |      |
| 22  | SXYQ1941-5 | 94.3 | 94.6 | 95.0 | 98.5 | 98.1  | 98.1  | 98.5 | 99.2  | 99.2  | 98.5 | 99.6  | 99.2  | 98.9 | 99.2  | 98.5 | 98.9 | 98.9 | 98.9 | 98.9 | 99.2 | 99.2 | ***  | 96.9  | 99.9  | 99.7  | 99.7  | 99.9  | 99.7 | 97.2  | 97.2  | 97.4 |       |      |      |
| 23  | SXYQ1922-2 | 94.6 | 95.0 | 95.4 | 98.9 | 98.5  | 98.5  | 98.9 | 99.6  | 99.6  | 98.9 | 100.0 | 99.6  | 99.2 | 99.6  | 98.9 | 99.2 | 99.2 | 99.2 | 99.2 | 99.6 | 99.6 | 99.6 | ***   | 97.1  | 96.9  | 97.2  | 97.1  | 96.9 | 99.1  | 99.1  | 98.5 | 98.5  |      |      |
| 24  | SXYQ1923-4 | 94.6 | 95.0 | 95.4 | 98.9 | 98.5  | 98.5  | 98.9 | 99.6  | 99.6  | 98.9 | 100.0 | 99.6  | 99.2 | 99.6  | 98.9 | 99.2 | 99.2 | 99.2 | 99.2 | 99.6 | 99.6 | 99.6 | 100.0 | ***   | 99.9  | 99.9  | 100.0 | 99.9 | 97.3  | 97.3  | 97.6 | 97.6  |      |      |
| 25  | SXYQ1927-2 | 94.6 | 95.0 | 95.4 | 98.9 | 98.5  | 98.5  | 98.9 | 99.6  | 99.6  | 98.9 | 100.0 | 99.6  | 99.2 | 99.6  | 98.9 | 99.2 | 99.2 | 99.2 | 99.2 | 99.6 | 99.6 | 99.6 | 100.0 | 100.0 | ***   | 99.7  | 99.9  | 99.7 | 97.2  | 97.2  | 97.4 | 97.4  |      |      |
| 26  | SXYQ1944-1 | 94.6 | 95.0 | 95.4 | 98.9 | 98.5  | 98.5  | 98.9 | 99.6  | 99.6  | 98.9 | 100.0 | 99.6  | 99.2 | 99.6  | 98.9 | 99.2 | 99.2 | 99.2 | 99.2 | 99.6 | 99.6 | 99.6 | 100.0 | 100.0 | ***   | 99.9  | 99.7  | 97.4 | 97.4  | 97.4  | 97.4 |       |      |      |
| 27  | SXYQ1965-3 | 94.6 | 95.0 | 95.4 | 98.9 | 98.5  | 98.5  | 98.9 | 99.6  | 99.6  | 98.9 | 100.0 | 99.6  | 99.2 | 99.6  | 98.9 | 99.2 | 99.2 | 99.2 | 99.2 | 99.6 | 99.6 | 99.6 | 100.0 | 100.0 | 100.0 | 100.0 | ***   | 99.9 | 97.3  | 97.3  | 97.6 | 97.6  |      |      |
| 28  | SXYQ1966-2 | 94.3 | 94.6 | 95.0 | 98.5 | 98.1  | 98.1  | 99.2 | 99.2  | 99.2  | 98.5 | 99.6  | 99.2  | 98.9 | 99.2  | 98.5 | 99.6 | 98.9 | 98.9 | 98.9 | 99.2 | 99.2 | 99.2 | 99.6  | 99.6  | 99.6  | 100.0 | 100.0 | 99.6 | ***   | 97.2  | 97.2 | 97.4  |      |      |
| 29  | SXYQ1966-4 | 94.6 | 95.0 | 95.4 | 98.9 | 98.5  | 98.5  | 98.9 | 99.6  | 99.6  | 98.9 | 100.0 | 99.6  | 99.2 | 99.6  | 98.9 | 99.2 | 99.2 | 99.2 | 99.2 | 99.6 | 99.6 | 99.6 | 100.0 | 100.0 | 100.0 | 100.0 | 100.0 | 99.6 | ***   | 100.0 | 98.3 | 98.3  |      |      |
| 30  | SXYQ1966-5 | 94.6 | 95.0 | 95.4 | 98.9 | 98.5  | 98.5  | 98.9 | 99.6  | 99.6  | 98.9 | 100.0 | 99.6  | 99.2 | 99.6  | 98.9 | 99.2 | 99.2 | 99.2 | 99.2 | 99.6 | 99.6 | 99.6 | 100.0 | 100.0 | 100.0 | 100.0 | 100.0 | 99.6 | 100.0 | ***   | 98.3 | 98.3  |      |      |
| 31  | SXYQ1968-2 | 94.6 | 95.0 | 95.4 | 98.9 | 98.5  | 98.5  | 98.9 | 99.6  | 99.6  | 98.9 | 100.0 | 99.6  | 99.2 | 99.6  | 98.9 | 99.2 | 99.2 | 99.2 | 99.2 | 99.6 | 99.6 | 99.6 | 100.0 | 100.0 | 100.0 | 100.0 | 100.0 | 99.6 | 100.0 | 100.0 | ***  | 100.0 |      |      |
| 32  | SXYQ1968-3 | 94.6 | 95.0 | 95.4 | 98.9 | 98.5  | 98.5  | 98.9 | 99.6  | 99.6  | 98.9 | 100.0 | 99.6  | 99.2 | 99.6  | 98.9 | 99.2 | 99.2 | 99.2 | 99.2 | 99.6 | 99.6 | 99.6 | 100.0 | 100.0 | 100.0 | 100.0 | 100.0 | 99.6 | 100.0 | 100.0 | ***  | 96.9  |      |      |
| 33  | SXYQ1944-2 | 93.9 | 94.3 | 94.6 | 98.1 | 97.7  | 97.7  | 98.1 | 98.9  | 98.9  | 98.1 | 99.1  | 98.9  | 98.5 | 98.9  | 98.1 | 98.5 | 98.5 | 98.5 | 98.5 | 98.9 | 98.9 | 98.9 | 99.2  | 99.2  | 99.2  | 99.2  | 99.2  | 98.9 | 99.2  | 99.2  | 99.2 | ***   |      |      |

Note: The lower left side of '\*\*\*' shows the results of amino acid homology, the upper right side of '\*\*\*' shows the results of nucleotide homology.
