# Supplementary material for: Genetic Characteristics of Wuxiang Virus in Shanxi Province, China
Source: MDPI journal article supplement (doi:10.3390/v16010103), 2024-01-10
Supplement: s1 [file s1]

**Table S1.** Background information of WUXV strains used in this study.

| No. | Strain     | Date       | Location                               | Host                         | Accession   |             |             |
|-----|------------|------------|----------------------------------------|------------------------------|-------------|-------------|-------------|
|     |            |            |                                        |                              | L segment   | M segment   | S segment   |
| 1   | SXJX2239   | 2022.07.29 | Jiexiu City, Shanxi Province, China    | <i>Phlebotomus chinensis</i> | C_AA050123* | C_AA050148* | C_AA050163* |
| 2   | SXJX2241   | 2022.07.29 | Jiexiu City, Shanxi Province, China    | <i>Phlebotomus chinensis</i> | C_AA050134* | C_AA050149* | C_AA050164* |
| 3   | SXJX2243   | 2022.07.29 | Jiexiu City, Shanxi Province, China    | <i>Phlebotomus chinensis</i> | C_AA050145* | C_AA050150* | C_AA050165* |
| 4   | SXWX1903-4 | 2019.06.14 | Wuxiang County, Shanxi Province, China | <i>Phlebotomus chinensis</i> | C_AA050156* | C_AA050151* | C_AA050166* |
| 5   | SXWX1913-2 | 2019.06.14 | Wuxiang County, Shanxi Province, China | <i>Phlebotomus chinensis</i> | C_AA050167* | C_AA050152* | C_AA050168* |
| 6   | SXWX1913-3 | 2019.06.14 | Wuxiang County, Shanxi Province, China | <i>Phlebotomus chinensis</i> | C_AA050178* | C_AA050153* | C_AA050169* |
| 7   | SXWX1917-1 | 2019.06.26 | Wuxiang County, Shanxi Province, China | <i>Phlebotomus chinensis</i> | C_AA050179* | C_AA050154* | C_AA050170* |
| 8   | SXWX1917-4 | 2019.06.26 | Wuxiang County, Shanxi Province, China | <i>Phlebotomus chinensis</i> | C_AA050180* | C_AA050155* | C_AA050171* |
| 9   | SXWX1918-3 | 2019.06.26 | Wuxiang County, Shanxi Province, China | <i>Phlebotomus chinensis</i> | C_AA050181* | C_AA050157* | C_AA050172* |
| 10  | SXWX1920-2 | 2019.06.26 | Wuxiang County, Shanxi Province, China | <i>Phlebotomus chinensis</i> | C_AA050124* | C_AA050158* | C_AA050173* |
| 11  | SXWX1920-3 | 2019.06.26 | Wuxiang County, Shanxi Province, China | <i>Phlebotomus chinensis</i> | C_AA050125* | C_AA050159* | C_AA050174* |
| 12  | SXWX1922-1 | 2019.06.26 | Wuxiang County, Shanxi Province, China | <i>Phlebotomus chinensis</i> | C_AA050126* | C_AA050160* | C_AA050175* |
| 13  | SXWX1923-4 | 2019.06.26 | Wuxiang County, Shanxi Province, China | <i>Phlebotomus chinensis</i> | C_AA050127* | C_AA050161* | C_AA050176* |
| 14  | SXWX1933   | 2019.07.19 | Wuxiang County, Shanxi Province, China | <i>Phlebotomus chinensis</i> | C_AA050128* | C_AA050162* | C_AA050177* |
| 15  | SXWX1813-2 | 2018.06./  | Wuxiang County, Shanxi Province, China | <i>Phlebotomus chinensis</i> | MN454526    | MN454527    | MN454528    |
| 16  | SXYQ1903   | 2019.06.11 | Yangquan City, Shanxi Province, China  | <i>Phlebotomus chinensis</i> | C_AA050129* | MW805211    | MW805193    |
| 17  | SXYQ1916   | 2019.06.11 | Yangquan City, Shanxi Province, China  | <i>Phlebotomus chinensis</i> | C_AA050130* | MW192754    | MW192750    |
| 18  | SXYQ1918-2 | 2019.06.11 | Yangquan City, Shanxi Province, China  | <i>Phlebotomus chinensis</i> | C_AA050131* | MW805213    | MW805195    |
| 19  | SXYQ1919-1 | 2019.06.11 | Yangquan City, Shanxi Province, China  | <i>Phlebotomus chinensis</i> | C_AA050132* | MW805214    | MW805197    |
| 20  | SXYQ1921-3 | 2019.06.11 | Yangquan City, Shanxi Province, China  | <i>Phlebotomus chinensis</i> | C_AA050133* | MW805216    | MW805198    |
| 21  | SXYQ1931   | 2019.06.11 | Yangquan City, Shanxi Province, China  | <i>Phlebotomus chinensis</i> | C_AA050138* | MW192757    | MW192753    |
| 22  | SXYQ1941-5 | 2019.06.11 | Yangquan City, Shanxi Province, China  | <i>Phlebotomus chinensis</i> | C_AA050139* | MW805219    | MW805201    |
| 23  | SXYQ1922-2 | 2019.06.11 | Yangquan City, Shanxi Province, China  | <i>Phlebotomus chinensis</i> | C_AA050135* | MW805217    | MW805199    |

|    |            |            |                                       |                              |             |          |          |
|----|------------|------------|---------------------------------------|------------------------------|-------------|----------|----------|
| 24 | SXYQ1923-4 | 2019.06.11 | Yangquan City, Shanxi Province, China | <i>Phlebotomus chinensis</i> | C_AA050136* | MW805218 | MW805200 |
| 25 | SXYQ1927-2 | 2019.06.11 | Yangquan City, Shanxi Province, China | <i>Phlebotomus chinensis</i> | C_AA050137* | MW192755 | MW192751 |
| 26 | SXYQ1944-1 | 2019.06.11 | Yangquan City, Shanxi Province, China | <i>Phlebotomus chinensis</i> | C_AA050140* | MW805220 | MW805202 |
| 27 | SXYQ1944-2 | 2019.06.11 | Yangquan City, Shanxi Province, China | <i>Phlebotomus chinensis</i> | MW805191    | MW805210 | MW805192 |
| 28 | SXYQ1965-3 | 2019.06.25 | Yangquan City, Shanxi Province, China | <i>Phlebotomus chinensis</i> | C_AA050141* | MW805222 | MW805204 |
| 29 | SXYQ1966-2 | 2019.06.25 | Yangquan City, Shanxi Province, China | <i>Phlebotomus chinensis</i> | C_AA050142* | MW805223 | MW805205 |
| 30 | SXYQ1966-4 | 2019.06.25 | Yangquan City, Shanxi Province, China | <i>Phlebotomus chinensis</i> | C_AA050143* | MW805224 | MW805206 |
| 31 | SXYQ1966-5 | 2019.06.25 | Yangquan City, Shanxi Province, China | <i>Phlebotomus chinensis</i> | C_AA050144* | MW805225 | MW805207 |
| 32 | SXYQ1968-2 | 2019.06.25 | Yangquan City, Shanxi Province, China | <i>Phlebotomus chinensis</i> | C_AA050146* | MW805226 | MW805208 |
| 33 | SXYQ1968-3 | 2019.06.25 | Yangquan City, Shanxi Province, China | <i>Phlebotomus chinensis</i> | C_AA050147* | MW805227 | MW805209 |

Note: '/' indicates no reference in database, \* sequences obtained in this study.
