# Supplementary material for: Genetic Characteristics of Wuxiang Virus in Shanxi Province, China
Source: MDPI journal article supplement (doi:10.3390/v16010103), 2024-01-10
Supplement: s1 [file s1]

**Table S5.** The homology analysis of nucleotides and amino acids in ORF in N gene.

| No. | Strain     | No.  |      |      |       |       |       |      |       |       |       |       |      |       |       |      |      |      |      |      |      |      |      |      |      |      |      |      |      |      |      |      |      |      |      |
|-----|------------|------|------|------|-------|-------|-------|------|-------|-------|-------|-------|------|-------|-------|------|------|------|------|------|------|------|------|------|------|------|------|------|------|------|------|------|------|------|------|
|     |            | 1    | 2    | 3    | 4     | 5     | 6     | 7    | 8     | 9     | 10    | 11    | 12   | 13    | 14    | 15   | 16   | 17   | 18   | 19   | 20   | 21   | 22   | 23   | 24   | 25   | 26   | 27   | 28   | 29   | 30   | 31   | 32   | 33   |      |
| 1   | SXJX2239   | ***  | 99.7 | 98.2 | 91.5  | 91.6  | 91.6  | 91.5 | 92.2  | 92.2  | 91.6  | 92.2  | 91.4 | 92.2  | 91.9  | 91.4 | 91.8 | 92.3 | 92.2 | 92.2 | 92.3 | 91.4 | 91.9 | 92   | 91.9 | 91.6 | 91.9 | 91.9 | 91.9 | 92.2 | 91.8 | 91.8 | 92.3 | 92   | 92.3 |
| 2   | SXJX2241   | 100  | ***  | 98.2 | 91.5  | 91.6  | 91.6  | 91.5 | 92.2  | 92.2  | 91.6  | 92.2  | 91.4 | 91.9  | 91.9  | 91.4 | 91.8 | 92.3 | 92.2 | 92.2 | 92.3 | 91.4 | 92.2 | 92   | 91.9 | 91.9 | 91.9 | 91.9 | 92.2 | 91.8 | 91.8 | 92.3 | 92   | 92.3 |      |
| 3   | SXJX2243   | 100  | 100  | ***  | 90.7  | 90.8  | 90.8  | 90.7 | 91.5  | 91.5  | 90.8  | 91.5  | 90.7 | 91.5  | 91.2  | 90.6 | 91.1 | 91.9 | 91.8 | 91.8 | 91.9 | 90.7 | 91.5 | 91.5 | 91.2 | 91.2 | 91.2 | 91.2 | 91.5 | 91.5 | 91.5 | 91.9 | 91.6 | 91.6 |      |
| 4   | SXWX1903-4 | 99.6 | 99.6 | 99.6 | ***   | 98.9  | 98.9  | 98.8 | 98.2  | 98.2  | 98.9  | 98.2  | 98.8 | 99.1  | 98.2  | 99.9 | 98.1 | 98.1 | 98.0 | 98.0 | 98.1 | 97.4 | 98.2 | 98.1 | 98.2 | 98.0 | 98.2 | 98.0 | 98.2 | 97.8 | 97.6 | 97.8 | 97.8 | 98.4 |      |
| 5   | SXWX1913-2 | 99.6 | 99.6 | 99.6 | 100.0 | ***   | 100.0 | 99.7 | 98.5  | 98.5  | 99.9  | 98.5  | 99.1 | 99.3  | 98.5  | 98.8 | 98.4 | 98.4 | 98.2 | 98.2 | 98.4 | 97.7 | 98.5 | 98.4 | 98.5 | 98.2 | 98.5 | 98.2 | 98.5 | 98.1 | 97.8 | 98.1 | 98.1 | 98.7 |      |
| 6   | SXWX1913-3 | 99.6 | 99.6 | 99.6 | 100.0 | 100.0 | ***   | 99.7 | 98.5  | 98.5  | 99.9  | 98.5  | 99.1 | 99.3  | 98.5  | 98.8 | 98.4 | 98.4 | 98.2 | 98.2 | 98.4 | 97.7 | 98.5 | 98.4 | 98.5 | 98.2 | 98.5 | 98.2 | 98.5 | 98.1 | 97.8 | 98.1 | 98.1 | 98.7 |      |
| 7   | SXWX1917-1 | 99.2 | 99.2 | 99.2 | 99.6  | 99.6  | 99.6  | ***  | 98.4  | 98.4  | 99.9  | 98.4  | 98.9 | 99.2  | 98.4  | 98.7 | 98.2 | 98.2 | 98.1 | 98.1 | 98.2 | 97.6 | 98.4 | 98.2 | 98.4 | 98.1 | 98.4 | 98.1 | 98.4 | 98.0 | 97.7 | 98.0 | 98.0 | 98.5 |      |
| 8   | SXWX1917-4 | 99.6 | 99.6 | 99.6 | 100.0 | 100.0 | 100.0 | 99.6 | ***   | 99.7  | 98.5  | 100.0 | 98.4 | 98.7  | 99.7  | 98.1 | 98.8 | 99.1 | 98.9 | 98.9 | 99.1 | 98.1 | 98.9 | 98.8 | 98.9 | 98.7 | 98.9 | 98.7 | 98.9 | 98.5 | 98.2 | 98.5 | 98.5 | 98.8 |      |
| 9   | SXWX1918-3 | 99.6 | 99.6 | 99.6 | 100.0 | 100.0 | 100.0 | 99.6 | 100.0 | ***   | 98.5  | 99.7  | 98.4 | 98.7  | 99.7  | 98.1 | 98.8 | 99.1 | 98.9 | 98.9 | 99.1 | 98.1 | 98.9 | 98.8 | 98.9 | 98.7 | 98.9 | 98.7 | 98.9 | 98.5 | 98.2 | 98.5 | 98.5 | 98.8 |      |
| 10  | SXWX1920-2 | 99.6 | 99.6 | 99.6 | 100.0 | 100.0 | 100.0 | 99.6 | 100.0 | 100.0 | ***   | 98.5  | 99.1 | 99.3  | 98.5  | 98.8 | 98.4 | 98.4 | 98.2 | 98.2 | 98.4 | 97.7 | 98.5 | 98.4 | 98.5 | 98.2 | 98.5 | 98.2 | 98.5 | 98.1 | 97.8 | 98.1 | 98.1 | 98.7 |      |
| 11  | SXWX1920-3 | 99.6 | 99.6 | 99.6 | 100.0 | 100.0 | 100.0 | 99.6 | 100.0 | 100.0 | 100.0 | ***   | 98.4 | 98.7  | 99.7  | 98.1 | 98.8 | 99.1 | 98.9 | 98.9 | 99.1 | 98.1 | 98.9 | 98.8 | 98.9 | 98.7 | 98.9 | 98.7 | 98.9 | 98.5 | 98.2 | 98.5 | 98.5 | 98.8 |      |
| 12  | SXWX1922-1 | 99.2 | 99.2 | 99.2 | 99.6  | 99.6  | 99.6  | 99.2 | 99.6  | 99.6  | 99.6  | 99.6  | ***  | 99.2  | 98.4  | 98.7 | 98.2 | 98.2 | 98.1 | 98.1 | 98.2 | 97.6 | 98.4 | 98.2 | 98.4 | 98.1 | 98.4 | 98.4 | 98.4 | 98.0 | 97.7 | 98.0 | 98.0 | 98.5 |      |
| 13  | SXWX1923-4 | 99.6 | 99.6 | 99.6 | 100.0 | 100.0 | 100.0 | 99.6 | 100.0 | 100.0 | 100.0 | 100.0 | 99.6 | ***   | 98.7  | 98.9 | 98.5 | 98.5 | 98.4 | 98.4 | 98.5 | 97.8 | 98.7 | 98.5 | 98.7 | 98.4 | 98.7 | 98.4 | 98.7 | 98.5 | 98.2 | 98.2 | 98.2 | 98.8 |      |
| 14  | SXWX1933   | 99.6 | 99.6 | 99.6 | 100.0 | 100.0 | 100.0 | 99.6 | 100.0 | 100.0 | 100.0 | 100.0 | 99.6 | 100.0 | ***   | 98.1 | 98.8 | 99.1 | 98.9 | 98.9 | 99.1 | 98.1 | 98.9 | 98.8 | 98.9 | 98.7 | 98.9 | 98.7 | 98.9 | 98.5 | 98.2 | 98.5 | 98.5 | 98.8 |      |
| 15  | SXWX1813-2 | 99.6 | 99.6 | 99.6 | 100.0 | 100.0 | 100.0 | 99.6 | 100.0 | 100.0 | 100.0 | 100.0 | 99.6 | 100.0 | 100.0 | ***  | 98.2 | 98.0 | 97.8 | 97.8 | 98.0 | 97.3 | 98.1 | 98.0 | 98.1 | 97.8 | 98.1 | 97.8 | 98.1 | 97.7 | 97.4 | 97.7 | 97.7 | 98.2 |      |
| 16  | SXYQ1903   | 99.2 | 99.2 | 99.2 | 99.6  | 99.6  | 99.6  | 99.2 | 99.6  | 99.6  | 99.6  | 99.6  | 99.6 | 99.2  | 99.6  | 99.6 | 99.6 | ***  | 98.9 | 98.8 | 98.8 | 98.9 | 98.8 | 99.6 | 98.9 | 99.6 | 99.3 | 99.6 | 99.3 | 99.6 | 98.7 | 98.4 | 98.7 | 98.9 |      |
| 17  | SXYQ1916   | 99.6 | 99.6 | 99.6 | 100   | 100   | 100   | 99.6 | 100   | 100   | 100   | 100   | 99.6 | 100   | 100   | 100  | 99.6 | ***  | 99.9 | 99.9 | 100  | 98.2 | 99.1 | 99.1 | 99.1 | 98.8 | 99.1 | 98.8 | 99.1 | 98.8 | 98.5 | 98.9 | 98.9 | 98.9 |      |
| 18  | SXYQ1918-2 | 99.2 | 99.2 | 99.2 | 99.6  | 99.6  | 99.6  | 99.2 | 99.6  | 99.6  | 99.6  | 99.6  | 99.2 | 99.6  | 99.6  | 99.6 | 99.2 | 99.6 | ***  | 100  | 99.9 | 98.4 | 98.9 | 99.2 | 98.9 | 98.9 | 98.9 | 98.7 | 98.9 | 98.7 | 98.7 | 98.8 | 99.1 | 98.8 |      |
| 19  | SXYQ1919-1 | 99.2 | 99.2 | 99.2 | 99.6  | 99.6  | 99.6  | 99.2 | 99.6  | 99.6  | 99.6  | 99.6  | 99.2 | 99.6  | 99.6  | 99.6 | 99.2 | 99.6 | 100  | ***  | 99.9 | 98.4 | 98.9 | 99.2 | 98.9 | 98.9 | 98.9 | 98.7 | 98.9 | 98.7 | 98.7 | 98.8 | 99.1 | 98.8 |      |
| 20  | SXYQ1921-3 | 99.6 | 99.6 | 99.6 | 100   | 100   | 100   | 99.6 | 100   | 100   | 100   | 100   | 99.6 | 100   | 100   | 100  | 99.6 | 100  | 99.6 | 99.6 | ***  | 98.2 | 99.1 | 99.1 | 99.1 | 98.8 | 99.1 | 98.8 | 99.1 | 98.8 | 98.5 | 98.9 | 98.9 | 98.9 |      |
| 21  | SXYQ1931   | 98.8 | 98.8 | 98.8 | 99.2  | 99.2  | 99.2  | 98.8 | 99.2  | 99.2  | 99.2  | 99.2  | 98.8 | 99.2  | 99.2  | 99.2 | 98.8 | 99.2 | 99.6 | 99.6 | 99.2 | ***  | 98.9 | 98.5 | 99.2 | 98.9 | 98.9 | 98.9 | 98.9 | 98   | 98   | 98   | 98.2 | 98.2 |      |
| 22  | SXYQ1941-5 | 99.6 | 99.6 | 99.6 | 100   | 100   | 100   | 99.6 | 100   | 100   | 100   | 100   | 99.6 | 100   | 100   | 100  | 99.6 | 100  | 99.6 | 99.6 | 100  | 99.2 | ***  | 99.1 | 99.7 | 99.7 | 99.7 | 99.5 | 100  | 98.8 | 98.5 | 98.8 | 98.8 | 99.1 |      |
| 23  | SXYQ1922-2 | 99.2 | 99.2 | 99.2 | 99.6  | 99.6  | 99.6  | 99.2 | 99.6  | 99.6  | 99.6  | 99.6  | 99.2 | 99.6  | 99.6  | 99.6 | 99.2 | 99.6 | 100  | 100  | 99.6 | 99.6 | 99.6 | ***  | 99.1 | 99.1 | 99.1 | 99.1 | 98.8 | 99.1 | 98.9 | 99.2 | 99.1 | 98.9 |      |
| 24  | SXYQ1923-4 | 99.6 | 99.6 | 99.6 | 100   | 100   | 100   | 99.6 | 100   | 100   | 100   | 100   | 99.6 | 100   | 100   | 100  | 99.6 | 100  | 99.6 | 100  | 99.6 | 99.6 | 100  | 99.2 | 100  | 99.6 | ***  | 99.5 | 99.7 | 99.7 | 99.7 | 98.8 | 98.5 | 98.8 | 98.8 |
| 25  | SXYQ1927-2 | 98.8 | 98.8 | 98.8 | 99.2  | 99.2  | 99.2  | 98.8 | 99.2  | 99.2  | 99.2  | 99.2  | 98.8 | 99.2  | 99.2  | 99.2 | 98.8 | 99.2 | 99.6 | 99.6 | 99.2 | 99.2 | 99.2 | 99.2 | 99.6 | 99.2 | ***  | 99.5 | 99.2 | 99.7 | 98.5 | 98.5 | 98.5 | 98.8 |      |
| 26  | SXYQ1944-1 | 99.6 | 99.6 | 99.6 | 100   | 100   | 100   | 99.6 | 100   | 100   | 100   | 100   | 99.6 | 100   | 100   | 100  | 99.6 | 100  | 99.6 | 100  | 99.6 | 100  | 99.2 | 100  | 99.6 | 100  | 99.2 | ***  | 99.5 | 99.7 | 98.8 | 98.5 | 98.8 | 98.8 | 99.1 |
| 27  | SXYQ1965-3 | 99.6 | 99.6 | 99.6 | 100   | 100   | 100   | 99.6 | 100   | 100   | 100   | 100   | 99.6 | 100   | 100   | 100  | 99.6 | 100  | 99.6 | 99.6 | 100  | 99.2 | 100  | 99.6 | 100  | 99.2 | 100  | ***  | 99.5 | 98.5 | 98.2 | 98.5 | 98.5 | 98.8 |      |
| 28  | SXYQ1966-2 | 99.6 | 99.6 | 99.6 | 100   | 100   | 100   | 99.6 | 100   | 100   | 100   | 100   | 99.6 | 100   | 100   | 100  | 99.6 | 100  | 99.6 | 99.6 | 100  | 99.2 | 100  | 99.6 | 100  | 99.2 | 100  | 100  | ***  | 98.8 | 98.5 | 98.8 | 98.8 | 99.1 |      |
| 29  | SXYQ1966-4 | 99.6 | 99.6 | 99.6 | 100   | 100   | 100   | 99.6 | 100   | 100   | 100   | 100   | 99.6 | 100   | 100   | 100  | 99.6 | 100  | 99.6 | 99.6 | 100  | 99.2 | 100  | 99.6 | 100  | 99.2 | 100  | 100  | 100  | ***  | 99.7 | 98.5 | 98.5 | 98.7 |      |
| 30  | SXYQ1966-5 | 99.2 | 99.2 | 99.2 | 99.6  | 99.6  | 99.6  | 99.2 | 99.6  | 99.6  | 99.6  | 99.6  | 99.2 | 99.6  | 99.6  | 99.6 | 99.2 | 99.6 | 100  | 100  | 99.6 | 99.6 | 99.6 | 100  | 99.6 | 99.6 | 99.6 | 99.6 | 99.6 | ***  | 98.5 | 98.5 | 98.4 |      |      |
| 31  | SXYQ1968-2 | 99.6 | 99.6 | 99.6 | 100   | 100   | 100   | 99.6 | 100   | 100   | 100   | 100   | 99.6 | 100   | 100   | 100  | 99.6 | 100  | 99.6 | 99.6 | 100  | 99.2 | 100  | 99.6 | 100  | 99.2 | 100  | 100  | 100  | 99.6 | ***  | 99.7 | 98.7 |      |      |
| 32  | SXYQ1968-3 | 99.2 | 99.2 | 99.2 | 99.6  | 99.6  | 99.6  | 99.2 | 99.6  | 99.6  | 99.6  | 99.6  | 99.2 | 99.6  | 99.6  | 99.6 | 99.2 | 99.6 | 100  | 99.6 | 99.6 | 100  | 99.6 | 99.6 | 100  | 99.6 | 99.6 | 99.6 | 99.6 | 99.6 | 100  | 99.6 | ***  | 98.7 |      |
| 33  | SXYQ1944-2 | 99.6 | 99.6 | 99.6 | 100   | 100   | 100   | 99.6 | 100   | 100   | 100   | 100   | 99.6 | 100   | 100   | 100  | 99.6 | 100  | 99.6 | 99.6 | 100  | 99.2 | 100  | 99.6 | 100  | 99.2 | 100  | 100  | 100  | 99.6 | 100  | 99.6 | 100  | 99.6 | ***  |

Note: The lower left side of '\*\*\*' shows the results of amino acid homology, the upper right side of '\*\*\*' shows the results of nucleotide homology.
