# Supplementary material for: Genetic Characteristics of Wuxiang Virus in Shanxi Province, China
Source: MDPI journal article supplement (doi:10.3390/v16010103), 2024-01-10
Supplement: s1 [file s1]

**Table S2.** The homology analysis of nucleotides and amino acids in ORF sequence in L segment.

| No. | Strain     | No.  |      |      |      |      |      |      |      |      |      |      |      |      |      |      |      |       |       |       |      |      |      |      |      |      |      |      |      |       |      |       |       |      |      |
|-----|------------|------|------|------|------|------|------|------|------|------|------|------|------|------|------|------|------|-------|-------|-------|------|------|------|------|------|------|------|------|------|-------|------|-------|-------|------|------|
|     |            | 1    | 2    | 3    | 4    | 5    | 6    | 7    | 8    | 9    | 10   | 11   | 12   | 13   | 14   | 15   | 16   | 17    | 18    | 19    | 20   | 21   | 22   | 23   | 24   | 25   | 26   | 27   | 28   | 29    | 30   | 31    | 32    | 33   |      |
| 1   | SXJX2239   | ***  | 98.0 | 97.5 | 90.2 | 90.4 | 90.2 | 90.2 | 90.2 | 90.4 | 90.2 | 90.2 | 90.3 | 90.3 | 90.3 | 90.2 | 90.1 | 90    | 90.0  | 90.1  | 90.1 | 90.1 | 89.9 | 90.1 | 90.0 | 90   | 90.0 | 90   | 90.0 | 90.1  | 90.2 | 90.1  | 90.1  | 90.1 | 90.1 |
| 2   | SXJX2241   | 99.7 | ***  | 97.9 | 90.6 | 90.6 | 90.5 | 90.5 | 90.6 | 90.7 | 90.5 | 90.6 | 90.6 | 90.5 | 90.6 | 90.6 | 90.4 | 90.4  | 90.5  | 90.5  | 90.5 | 90.5 | 90.3 | 90.5 | 90.4 | 90.3 | 90.4 | 90.3 | 90.4 | 90.5  | 90.5 | 90.4  | 90.4  | 90.5 |      |
| 3   | SXJX2243   | 99.6 | 99.6 | ***  | 90.2 | 90.2 | 90.1 | 90.1 | 90.1 | 90.3 | 90.1 | 90.1 | 90.2 | 90.2 | 90.2 | 90.2 | 90.0 | 90.1  | 90.1  | 90.1  | 90.1 | 90   | 89.9 | 90.1 | 89.9 | 89.9 | 89.9 | 89.9 | 89.9 | 90.2  | 90.2 | 90.1  | 90.1  | 90.2 |      |
| 4   | SXWX1903-4 | 98.7 | 98.8 | 98.7 | ***  | 97.9 | 99.1 | 99.1 | 97.9 | 98.0 | 99.1 | 97.9 | 99.3 | 98.0 | 98.0 | 99.8 | 97.3 | 97.6  | 97.6  | 97.6  | 97.6 | 97.4 | 97.3 | 97.7 | 97.2 | 97.3 | 97.3 | 97.3 | 97.3 | 97.6  | 97.8 | 97.7  | 97.7  | 97.6 |      |
| 5   | SXWX1913-2 | 98.8 | 98.8 | 98.8 | 99.5 | ***  | 98.0 | 98.0 | 98.2 | 98.3 | 98.0 | 98.2 | 98.2 | 98.2 | 98.3 | 97.9 | 97.1 | 97.4  | 97.5  | 97.5  | 97.4 | 97.3 | 97.1 | 97.5 | 97.1 | 97.2 | 97.1 | 97.1 | 97.1 | 97.4  | 97.6 | 97.5  | 97.5  | 97.4 |      |
| 6   | SXWX1913-3 | 98.8 | 98.8 | 98.8 | 99.6 | 99.6 | ***  | 99.8 | 98.1 | 98.2 | 99.9 | 98.1 | 99.4 | 98.2 | 98.2 | 99.2 | 97.3 | 97.7  | 97.8  | 97.8  | 97.7 | 97.4 | 97.3 | 97.8 | 97.3 | 97.4 | 97.3 | 97.3 | 97.3 | 97.7  | 97.9 | 97.8  | 97.8  | 97.7 |      |
| 7   | SXWX1917-1 | 98.8 | 98.8 | 98.8 | 99.6 | 99.6 | 99.9 | ***  | 98.0 | 98.1 | 99.8 | 98.0 | 99.3 | 98.1 | 98.2 | 99.1 | 97.3 | 97.8  | 97.8  | 97.8  | 97.8 | 97.4 | 97.4 | 97.9 | 97.3 | 97.4 | 97.4 | 97.3 | 97.4 | 97.8  | 98.0 | 97.8  | 97.8  | 97.8 |      |
| 8   | SXWX1917-4 | 98.8 | 98.8 | 98.8 | 99.5 | 99.7 | 99.6 | 99.6 | ***  | 99.6 | 98.1 | 99.9 | 98.2 | 98.4 | 99.7 | 98.0 | 97.1 | 97.5  | 97.5  | 97.6  | 97.5 | 97.3 | 97.1 | 97.6 | 97.1 | 97.2 | 97.2 | 97.1 | 97.2 | 97.5  | 97.7 | 97.5  | 97.5  | 97.5 |      |
| 9   | SXWX1918-3 | 98.7 | 98.7 | 98.7 | 99.4 | 99.6 | 99.5 | 99.5 | 99.8 | ***  | 98.2 | 99.7 | 98.3 | 98.5 | 99.8 | 98.1 | 97.2 | 97.6  | 97.6  | 97.7  | 97.6 | 97.4 | 97.2 | 97.7 | 97.2 | 97.3 | 97.3 | 97.2 | 97.2 | 97.6  | 97.8 | 97.7  | 97.7  | 97.6 |      |
| 10  | SXWX1920-2 | 98.7 | 98.7 | 98.7 | 99.5 | 99.5 | 99.9 | 99.9 | 99.5 | 99.4 | ***  | 98.1 | 99.3 | 98.2 | 98.2 | 99.1 | 97.3 | 97.7  | 97.7  | 97.8  | 97.7 | 97.4 | 97.3 | 97.8 | 97.2 | 97.3 | 97.3 | 97.3 | 97.3 | 97.7  | 97.9 | 97.8  | 97.8  | 97.7 |      |
| 11  | SXWX1920-3 | 98.7 | 98.7 | 98.7 | 99.4 | 99.6 | 99.5 | 99.5 | 99.9 | 99.7 | 99.4 | ***  | 98.2 | 98.5 | 99.7 | 98.0 | 97.1 | 97.5  | 97.5  | 97.6  | 97.5 | 97.3 | 97.1 | 97.6 | 97.1 | 97.2 | 97.2 | 97.1 | 97.2 | 97.5  | 97.7 | 97.5  | 97.5  | 97.5 |      |
| 12  | SXWX1922-1 | 98.7 | 98.7 | 98.7 | 99.5 | 99.5 | 99.6 | 99.6 | 99.5 | 99.4 | 99.5 | 99.4 | ***  | 98.3 | 98.3 | 99.3 | 97.4 | 97.8  | 97.8  | 97.9  | 97.8 | 97.6 | 97.5 | 97.9 | 97.4 | 97.5 | 97.5 | 97.4 | 97.5 | 97.8  | 98.0 | 97.9  | 97.9  | 97.8 |      |
| 13  | SXWX1923-4 | 98.5 | 98.5 | 98.5 | 99.2 | 99.4 | 99.3 | 99.3 | 99.6 | 99.5 | 99.2 | 99.5 | 99.3 | ***  | 98.6 | 98.0 | 97.1 | 97.5  | 97.6  | 97.6  | 97.5 | 97.3 | 97.1 | 97.6 | 97.1 | 97.2 | 97.2 | 97.1 | 97.2 | 97.5  | 97.7 | 97.5  | 97.5  | 97.6 |      |
| 14  | SXWX1933   | 98.8 | 98.8 | 98.8 | 99.5 | 99.7 | 99.6 | 99.6 | 99.9 | 99.8 | 99.5 | 99.8 | 99.5 | 99.6 | ***  | 98.1 | 97.2 | 97.6  | 97.7  | 97.7  | 97.6 | 97.4 | 97.3 | 97.8 | 97.2 | 97.3 | 97.3 | 97.2 | 97.3 | 97.6  | 97.8 | 97.7  | 97.7  | 97.6 |      |
| 15  | SXWX1813-2 | 98.7 | 98.8 | 98.7 | 99.8 | 99.5 | 99.6 | 99.6 | 99.5 | 99.4 | 99.5 | 99.4 | 99.5 | 99.3 | 99.5 | ***  | 97.3 | 97.6  | 97.7  | 97.7  | 97.6 | 97.4 | 97.3 | 97.8 | 97.3 | 97.4 | 97.3 | 97.3 | 97.4 | 97.6  | 97.8 | 97.7  | 97.7  | 97.6 |      |
| 16  | SXYQ1903   | 98.7 | 98.7 | 98.7 | 99.4 | 99.5 | 99.5 | 99.5 | 99.6 | 99.5 | 99.4 | 99.5 | 99.4 | 99.3 | 99.6 | 99.4 | ***  | 97.8  | 97.9  | 97.9  | 97.8 | 99.5 | 99.6 | 97.9 | 99.6 | 99.6 | 99.7 | 99.6 | 99.6 | 97.8  | 98.0 | 97.9  | 97.9  | 97.8 |      |
| 17  | SXYQ1916   | 98.8 | 98.7 | 98.8 | 99.5 | 99.6 | 99.5 | 99.5 | 99.7 | 99.6 | 99.5 | 99.6 | 99.5 | 99.3 | 99.7 | 99.5 | 99.7 | ***   | 99.8  | 99.9  | 99.8 | 98.0 | 97.8 | 99.2 | 97.8 | 97.9 | 97.9 | 97.9 | 97.8 | 99.1  | 99.0 | 98.2  | 98.2  | 99.6 |      |
| 18  | SXYQ1918-2 | 98.7 | 98.7 | 98.7 | 99.4 | 99.5 | 99.4 | 99.4 | 99.6 | 99.5 | 99.4 | 99.5 | 99.4 | 99.2 | 99.6 | 99.4 | 99.7 | 100.0 | ***   | 99.9  | 99.8 | 98.1 | 97.9 | 99.2 | 97.9 | 97.9 | 97.9 | 98.0 | 97.9 | 99.1  | 99.1 | 98.2  | 98.2  | 99.7 |      |
| 19  | SXYQ1919-1 | 98.8 | 98.7 | 98.7 | 99.4 | 99.5 | 99.5 | 99.5 | 99.6 | 99.5 | 99.4 | 99.5 | 99.4 | 99.3 | 99.6 | 99.4 | 99.7 | 100.0 | 100.0 | ***   | 99.9 | 98.1 | 97.9 | 99.2 | 97.9 | 98.0 | 98.0 | 98.0 | 97.9 | 99.2  | 99.1 | 98.3  | 98.3  | 99.7 |      |
| 20  | SXYQ1921-3 | 98.7 | 98.7 | 98.7 | 99.4 | 99.5 | 99.4 | 99.4 | 99.6 | 99.5 | 99.4 | 99.5 | 99.4 | 99.2 | 99.6 | 99.4 | 99.7 | 100.0 | 99.9  | 100.0 | ***  | 98.0 | 97.9 | 99.2 | 97.9 | 97.9 | 97.9 | 97.9 | 97.9 | 99.1  | 99.0 | 98.3  | 98.3  | 99.7 |      |
| 21  | SXYQ1931   | 98.7 | 98.7 | 98.7 | 99.4 | 99.5 | 99.4 | 99.4 | 99.5 | 99.4 | 99.4 | 99.4 | 99.4 | 99.2 | 99.5 | 99.4 | 99.9 | 99.7  | 99.7  | 99.7  | 99.7 | ***  | 99.5 | 98.1 | 99.5 | 99.6 | 99.6 | 99.5 | 99.5 | 98.0  | 98.2 | 98.1  | 98.1  | 98.0 |      |
| 22  | SXYQ1941-5 | 98.6 | 98.6 | 98.6 | 99.3 | 99.4 | 99.4 | 99.4 | 99.5 | 99.4 | 99.3 | 99.4 | 99.3 | 99.2 | 99.5 | 99.3 | 99.9 | 99.7  | 99.6  | 99.7  | 99.6 | 99.9 | ***  | 98.0 | 99.6 | 99.7 | 99.6 | 99.6 | 99.7 | 97.8  | 98.1 | 98.0  | 98.0  | 97.9 |      |
| 23  | SXYQ1922-2 | 98.7 | 98.6 | 98.6 | 99.3 | 99.4 | 99.4 | 99.4 | 99.5 | 99.4 | 99.3 | 99.4 | 99.3 | 99.2 | 99.5 | 99.3 | 99.7 | 99.9  | 99.8  | 99.9  | 99.8 | 99.7 | 99.6 | ***  | 97.9 | 98.0 | 98.0 | 98.0 | 99.2 | 99.2  | 98.3 | 98.3  | 99.1  |      |      |
| 24  | SXYQ1923-4 | 98.6 | 98.6 | 98.6 | 99.3 | 99.4 | 99.4 | 99.4 | 99.5 | 99.4 | 99.3 | 99.4 | 99.3 | 99.2 | 99.5 | 99.3 | 99.9 | 99.7  | 99.6  | 99.7  | 99.6 | 99.9 | 99.8 | 99.6 | ***  | 99.6 | 99.6 | 99.8 | 99.6 | 97.8  | 98.0 | 98.0  | 98.0  | 97.8 |      |
| 25  | SXYQ1927-2 | 98.7 | 98.7 | 98.7 | 99.4 | 99.5 | 99.4 | 99.4 | 99.5 | 99.4 | 99.4 | 99.4 | 99.4 | 99.2 | 99.5 | 99.4 | 99.9 | 99.7  | 99.7  | 99.7  | 99.7 | 99.9 | 99.9 | 99.7 | 99.9 | ***  | 99.7 | 99.6 | 99.8 | 97.9  | 98.1 | 98.1  | 98.1  | 97.9 |      |
| 26  | SXYQ1944-1 | 98.5 | 98.5 | 98.5 | 99.3 | 99.4 | 99.3 | 99.3 | 99.4 | 99.3 | 99.3 | 99.3 | 99.3 | 99.1 | 99.4 | 99.3 | 99.8 | 99.6  | 99.5  | 99.6  | 99.5 | 99.8 | 99.7 | 99.5 | 99.7 | 99.8 | ***  | 99.6 | 99.7 | 97.9  | 98.1 | 98.0  | 98.0  | 97.9 |      |
| 27  | SXYQ1965-3 | 98.6 | 98.6 | 98.6 | 99.3 | 99.4 | 99.4 | 99.4 | 99.5 | 99.4 | 99.3 | 99.4 | 99.4 | 99.2 | 99.5 | 99.3 | 99.9 | 99.7  | 99.6  | 99.7  | 99.6 | 99.9 | 99.8 | 99.6 | 99.9 | 99.9 | 99.7 | ***  | 99.6 | 97.9  | 98.1 | 98.0  | 98.0  | 97.9 |      |
| 28  | SXYQ1966-2 | 98.6 | 98.6 | 98.6 | 99.3 | 99.4 | 99.3 | 99.3 | 99.4 | 99.3 | 99.3 | 99.3 | 99.3 | 99.1 | 99.4 | 99.3 | 99.8 | 99.6  | 99.6  | 99.6  | 99.6 | 99.8 | 99.8 | 99.6 | 99.8 | 99.8 | 99.7 | 99.8 | ***  | 97.8  | 98.1 | 98.0  | 98.0  | 97.8 |      |
| 29  | SXYQ1966-4 | 98.7 | 98.6 | 98.6 | 99.3 | 99.4 | 99.4 | 99.4 | 99.5 | 99.4 | 99.3 | 99.4 | 99.3 | 99.2 | 99.5 | 99.3 | 99.6 | 99.9  | 99.8  | 99.9  | 99.8 | 99.6 | 99.6 | 99.8 | 99.6 | 99.6 | 99.5 | 99.6 | 99.5 | ***   | 99.8 | 98.2  | 98.2  | 99.0 |      |
| 30  | SXYQ1966-5 | 98.7 | 98.7 | 98.7 | 99.4 | 99.5 | 99.4 | 99.4 | 99.5 | 99.4 | 99.4 | 99.4 | 99.4 | 99.3 | 99.5 | 99.4 | 99.7 | 99.9  | 99.9  | 99.9  | 99.9 | 99.7 | 99.6 | 99.8 | 99.6 | 99.7 | 99.5 | 99.6 | 99.6 | 100.0 | ***  | 98.4  | 98.4  | 99.0 |      |
| 31  | SXYQ1968-2 | 98.6 | 98.6 | 98.6 | 99.3 | 99.4 | 99.4 | 99.4 | 99.5 | 99.4 | 99.3 | 99.4 | 99.3 | 99.2 | 99.5 | 99.3 | 99.7 | 99.7  | 99.6  | 99.7  | 99.6 | 99.7 | 99.6 | 99.6 | 99.6 | 99.7 | 99.5 | 99.6 | 99.6 | 99.6  | 99.6 | ***   | 100.0 | 98.2 |      |
| 32  | SXYQ1968-3 | 98.6 | 98.6 | 98.6 | 99.3 | 99.4 | 99.4 | 99.4 | 99.5 | 99.4 | 99.3 | 99.4 | 99.3 | 99.2 | 99.5 | 99.3 | 99.7 | 99.7  | 99.6  | 99.7  | 99.6 | 99.7 | 99.6 | 99.6 | 99.6 | 99.7 | 99.5 | 99.6 | 99.6 | 99.6  | 99.6 | 100.0 | ***   | 98.2 |      |
| 33  | SXYQ1944-2 | 98.7 | 98.6 | 98.6 | 99.3 | 99.4 | 99.3 | 99.3 | 99.5 | 99.4 | 99.3 | 99.4 | 99.3 | 99.1 | 99.5 | 99.3 | 99.6 | 99.9  | 99.8  | 99.9  | 99.8 | 99.6 | 99.5 | 99.7 | 99.5 | 99.6 | 99.4 | 99.5 | 99.5 | 99.7  | 99.8 | 99.5  | 98.6  | ***  |      |

Note: The lower left side of '\*\*\*' shows the results of amino acid homology, the upper right side of '\*\*\*' shows the results of nucleotide homology.
